# Supplementary material for: Involvement of RDR6 in short-range intercellular RNA silencing in Nicotiana benthamiana
Source: PubMed Central journal article supplement — Sci Rep. 2012 Jun 22;2:467. doi: 10.1038/srep00467 (PMC3381291; doi:10.1038/srep00467), 2012-06-22
Supplement: srep00467-s1.pdf [file srep00467-s1.pdf]

## Supplementary Information

### Involvement of *RDR6* in short-range intercellular RNA silencing in *Nicotiana benthamiana*

Cheng Qin<sup>a†</sup>, Nongnong Shi<sup>a,b†</sup>, Mei Gu<sup>c†</sup>, Hang Zhang<sup>b,d</sup>, Bin Li<sup>a</sup>, Jiajia Shen<sup>a</sup>, Atef Mohammed<sup>b,e</sup>, Eugene Ryabov<sup>b</sup>, Chunyang Li<sup>b,d</sup>, Huizhong Wang<sup>a</sup>, Yule Liu<sup>f</sup>, Toba Osman<sup>b,e</sup>, Manu Vatish<sup>c</sup> and Yiguo Hong<sup>a,b\*</sup>

<sup>a</sup>Research Centre for Plant RNA Signalling, College of Life and Environmental Sciences, Hangzhou Normal University, Hangzhou 310036, China. <sup>b</sup>Warwick HRI, University of Warwick, Warwick CV35 9EF, UK. <sup>c</sup>Clinical Sciences Research Institute, University of Warwick, Coventry CV2 2DX, UK. <sup>d</sup>Chengdu Rongsheng Pharmaceuticals, Chengdu 610041, China. <sup>e</sup>Department of Botany, Faculty of Agriculture, Fayoum University, Fayoum 63514, Egypt. <sup>f</sup>School of Life Sciences, Tsinghua University, Beijing 100084, China.

\*Correspondence and requests for materials should be addressed to Y. H.

([yghongabc@gmail.com](mailto:yghongabc@gmail.com), [yiguo.hong@hznu.edu.cn](mailto:yiguo.hong@hznu.edu.cn) or [yiguo.hong@warwick.ac.uk](mailto:yiguo.hong@warwick.ac.uk))

†These authors contributed equally to this work.

Supplementary Table S1 P values of Student's *t*-tests<sup>1</sup>.

| Comparisons              | <i>RDR6</i> <sup>2</sup>          | TCV                                           |
|--------------------------|-----------------------------------|-----------------------------------------------|
| <b><u>Mock</u></b>       |                                   |                                               |
| Nb vs NbRDR6i            | 0.0001 (Nb > NbRDR6i)             | -                                             |
| GFP16c vs GFP16c/RDR6i   | 0.0003<br>(GFP16c > GFP16c/RDR6i) | -                                             |
| <b><u>TCV-GFPΔCP</u></b> |                                   |                                               |
| Nb vs NbRDR6i            | 0.0001 (Nb > NbRDR6i)             | 0.085 <sup>3</sup>                            |
| GFP16c vs GFP16c/RDR6i   | 0.0001<br>(GFP16c > GFP16c/RDR6i) | 0.31 <sup>3</sup>                             |
| Nb vs GFP16c             | -                                 | 0.0037 (Nb > GFP16c) <sup>4</sup>             |
| NbRDR6i vs GFP16c/RDR6i  | -                                 | 0.0001<br>NbRDR6i > GFP16c/RDR6i <sup>4</sup> |

<sup>1</sup>Student's *t*-tests were carried out between the *RDR6* mRNA levels of wild-type (Nb) and *RDR6i* (NbRDR6i) *N. benthamiana* plants, and that of GFP16c and GFP16c *RDR6i* (GFP16c/RDR6i) plants. For the TCV RNA, student's *t*-tests were performed between Nb and NbRDR6i, GFP16c and GFP16c/RDR6i, Nb and GFP16c, as well as NbRDR6i and GFP16c/RDR6i. Plants were mock-inoculated or inoculated with TCV-GFPΔCP.

<sup>2</sup>RNAi significantly down-regulated *RDR6* expression.

<sup>3</sup>Knock-down of *RDR6* gene expression by RNAi had no impact on accumulation of TCV-GFPΔCP RNA in plants.

<sup>4</sup>Virus-induced RNA silencing significantly reduced the TCV-GFPΔCP RNA levels. RNAi-mediated inhibition of *RDR6* did not affect intracellular RNA silencing.

Supplementary Table S2 Two types of short-range intercellular RNA silencing

|                       | Transgene-induced RNA silencing <sup>8-12</sup> | Virus-induced RNA silencing (This study) |
|-----------------------|-------------------------------------------------|------------------------------------------|
| RNA silencing trigger | Transgene-originated Hairpin RNA                | Viral RNA                                |
| Cell types            | Companion to parenchyma                         | Epidermal to epidermal, mesophyll        |
| Short-range spread    | 10 – 15 cells                                   | 6 – 10 cells                             |
| <i>RDR6</i> gene      | Independent                                     | Dependent                                |
| Mobile signal         | 21-nt siRNA                                     | unknown                                  |
| Other factors         | <i>RDR2</i> , <i>NRPD1a</i>                     | Virus movement proteins <sup>14</sup>    |
| Plant species         | <i>Arabidopsis thaliana</i>                     | <i>Nicotiana benthamiana</i>             |

Supplementary Table S3 Specific primers for qRT-PCR assays

| Primers               | Sequences (5' – 3')       | RNA Targets                   |
|-----------------------|---------------------------|-------------------------------|
| NbEF1 $\alpha$ -qRT-F | TGCCTTGTGGAAGTTTGAGACC    | <i>EF1<math>\alpha</math></i> |
| NbEF1 $\alpha$ -qRT-R | GGTGGAGTCAATAATCAGGACAGC  | <i>EF1<math>\alpha</math></i> |
| NbGAPDH-qRT-F         | AGCTGGTGCTGATTCGTTGTG     | <i>GAPDH</i>                  |
| NbGAPDH-qRT-R         | GAGCAGAGATCACAAACCTTCTTGG | <i>GAPDH</i>                  |
| TCV-qRT-F             | CGGAATTGAGTTCAGCGTCCTTCCG | TCV                           |
| TCV-qRT-R             | GCAGGAGGGCCACCATTAC       | TCV                           |
| NbRDR6-qRT-F          | CTTTGGATGAGAAGTGCCTA      | <i>RDR6</i>                   |
| NbRDR6-qRT-R          | TTTGGGACAAGCTCAAGTC       | <i>RDR6</i>                   |
